# Supplementary material for: Chemical Profiling and Therapeutic Evaluation of Standardized Hydroalcoholic Extracts of Terminalia chebula Fruits Collected from Different Locations in Manipur against Colorectal Cancer
Source: MDPI journal article supplement (doi:10.3390/molecules28072901), 2023-03-23
Supplement: s1 [file s1]

**Supplementary Table S1:** GCMS analysis of Hydroalcoholic extract of *T. chebula* fruits collected from Chandel, Manipur.

|    | RT    | Compound                                                         | RSI | MW  | Area % |
|----|-------|------------------------------------------------------------------|-----|-----|--------|
| 1  | 20.29 | 1,2,3-Benzenetriol                                               | 917 | 126 | 20.95  |
| 2  | 40.04 | 2-Cyclopenten-1-one, 2-hydroxy-3,4-dimethyl                      | 880 | 126 | 19.32  |
| 3  | 15.53 | Catechol                                                         | 924 | 110 | 12.82  |
| 4  | 16.23 | 5-Hydroxymethylfurfural                                          | 882 | 126 | 6.04   |
| 5  | 27.51 | 1-Hexyl-2-nitrocyclohexane                                       | 904 | 213 | 4.13   |
| 6  | 22.50 | 1-Undecanol                                                      | 926 | 172 | 3.51   |
| 7  | 9.21  | Phenol                                                           | 914 | 94  | 3.27   |
| 8  | 40.12 | 1-Hexyl-2-nitrocyclohexane                                       | 972 | 213 | 2.3    |
| 9  | 36.98 | Hexadecanamide                                                   | 849 | 255 | 1.95   |
| 10 | 7.06  | Isothiazole                                                      | 818 | 85  | 1.93   |
| 11 | 13.79 | 4H-Pyran-4-one, 2,3-dihydro-3,5-dihydroxy-6- methyl              | 867 | 144 | 1.74   |
| 12 | 18.11 | 2,6-Difluorobenzoic acid, 4-nitrophenyl ester                    | 856 | 279 | 1.72   |
| 13 | 10.19 | 1-(1'-pyrrolidiny)-2-butanone                                    | 870 | 141 | 1.33   |
| 14 | 7.00  | Ethanone, 1-(3-methyloxiranyl)-                                  | 837 | 100 | 0.98   |
| 15 | 8.98  | Cyclobutaneethanol, á-methylene                                  | 916 | 112 | 0.92   |
| 16 | 10.84 | Benzeneacetaldehyde                                              | 910 | 120 | 0.89   |
| 17 | 21.82 | Sucrose                                                          | 838 | 342 | 0.83   |
| 18 | 40.42 | 9-Octadecenamide                                                 | 877 | 281 | 0.73   |
| 19 | 5.25  | 3-Furaldehyde                                                    | 936 | 96  | 0.68   |
| 20 | 44.14 | Naphthalene, 2-(1,1-dimethylethyl)decahydro -4a-methyl           | 852 | 208 | 0.66   |
| 21 | 27.66 | Cyclotridecane                                                   | 876 | 182 | 0.58   |
| 22 | 7.51  | Pentanal, 2,2-dimethyl-                                          | 833 | 114 | 0.55   |
| 23 | 20.76 | 3-Methoxy-4-hydroxy mandelonitrile                               | 830 | 179 | 0.55   |
| 24 | 9.60  | 2-Pyrrolidinecarboxylic acid, 1,2-dimethyl-5-oxo-, methyl ester  | 913 | 171 | 0.52   |
| 25 | 12.07 | Furyl hydroxymethyl ketone                                       | 844 | 126 | 0.44   |
| 26 | 42.94 | N-hydroxy-2,2,6,6-tetramethyl piperidin-4-one                    | 882 | 171 | 0.44   |
| 27 | 17.61 | Hydroquinone                                                     | 849 | 110 | 0.43   |
| 28 | 25.83 | Formic acid hydrazide                                            | 845 | 60  | 0.42   |
| 29 | 21.48 | benzoic acid, 4-hydroxy-, 4-cyanophenyl ester                    | 918 | 239 | 0.39   |
| 30 | 33.23 | Cyclooctanemethanol, à,à-dimethyl                                | 866 | 170 | 0.38   |
| 31 | 43.11 | 9H-Carbazole-1-carboxylic acid, 4-(1H-indol-3-yl)-, methyl ester | 756 | 340 | 0.38   |
| 32 | 9.45  | Phenol                                                           | 865 | 94  | 0.34   |
| 33 | 8.60  | 2-Furancarboxaldehyde, 5-methyl                                  | 861 | 110 | 0.33   |
| 34 | 36.63 | 9-Octadecenamide                                                 | 875 | 281 | 0.33   |
| 35 | 19.80 | Pentyl glycolate                                                 | 914 | 146 | 0.29   |
| 36 | 32.27 | 2,5-Cyclohexadien-1-one, 2,6-bis(1,1-dimethylethyl)-             | 883 | 232 | 0.28   |

|    |       |                                                                                                   |     |     |      |
|----|-------|---------------------------------------------------------------------------------------------------|-----|-----|------|
|    |       | 4-et hydridene                                                                                    |     |     |      |
| 37 | 9.56  | 2-Pyrrolidinecarboxylic acid, 1,2-dimethyl-5-oxo-, methyl ester                                   | 918 | 171 | 0.25 |
| 38 | 8.03  | 1H-Tetrazole, 5-vinyl-                                                                            | 860 | 96  | 0.23 |
| 39 | 21.97 | Sucrose                                                                                           | 823 | 342 | 0.22 |
| 40 | 44.77 | 8-Phenyl-6-thio-theophylline                                                                      | 759 | 272 | 0.22 |
| 41 | 13.57 | 3,5-Dimethyl-1,6-heptadien-4- ol                                                                  | 758 | 140 | 0.21 |
| 42 | 43.17 | 4-Methyl-2,4-bis(p-hydroxyphe nyl)pent-1-ene, 2TMS derivative                                     | 821 | 412 | 0.21 |
| 43 | 48.16 | Purin-2,6-dione, 1,3-dimethyl-8-[2-[3,4-dimethoxyphenyl]ethenyl]-                                 | 727 | 342 | 0.2  |
| 44 | 42.85 | 2H-1,3-Oxazine, tetrahydro-2,3,6-trimethyl                                                        | 743 | 129 | 0.19 |
| 45 | 22.95 | Ethyne, fluoro-                                                                                   | 950 | 44  | 0.19 |
| 46 | 58.93 | (7E)-2-Amino-4-hydroxy-7-[2- (4-methoxyphenyl)-2-oxoethyli dene]-7,8-dihydro-6(5H)-pteri dinone # | 714 | 327 | 0.17 |
| 47 | 55.54 | Phenol, 3-methoxy-5-methyl-2-(3,7,11 -trimethyl-2,6,10-dodecatrienyl)-, acetate, (E,E)-           | 648 | 384 | 0.17 |
| 48 | 58.83 | Thieno[2,3-b]pyridine, 5-ethyl-3-nitro                                                            | 698 | 208 | 0.16 |
| 49 | 33.93 | Oxalic acid, isobutyl tetradecyl ester                                                            | 830 | 342 | 0.15 |
| 50 | 25.34 | 1,2-Benzisothiazole, 3-butoxy-                                                                    | 813 | 207 | 0.15 |
| 51 | 49.92 | 3-Bromo-thiophene-2-carboxa mide                                                                  | 831 | 205 | 0.14 |
| 52 | 18.64 | 2-Buten-1-one, 1-(6,7,7-trimethyl-2,3-dioxabi cyclo[2.2.2]oct-5-en-1-yl)-, [1R-[1à(E),4à]]-       | 837 | 222 | 0.14 |
| 53 | 58.53 | 5-Benzofuranpropanol, 2-(1,3-benzodioxol-5-yl)-7-me thoxy                                         | 676 | 326 | 0.13 |
| 54 | 17.00 | 1-Hexyl-2-nitrocyclohexane                                                                        | 895 | 213 | 0.13 |
| 55 | 6.38  | Cyclopropylacetylene                                                                              | 870 | 66  | 0.13 |
| 56 | 58.45 | Cyclododecaneacetaldehyde                                                                         | 702 | 210 | 0.12 |
| 57 | 57.16 | 1-Formyl-2,6-dimethoxy-10-m ethyl-anthracene                                                      | 742 | 280 | 0.12 |
| 58 | 54.14 | 2-Formamidobenzophenone                                                                           | 864 | 225 | 0.12 |
| 59 | 51.08 | 1,4-Dihydro-3-(4-methoxyphen yl)-1,7-dimethyl-6H-[1,2,4]tri azino[4,3-b][[1,2,4,5]tetrazin-6 -one | 748 | 286 | 0.12 |
| 60 | 15.24 | Hexanoic acid, 5-methyl-3-oxo-, methyl ester                                                      | 878 | 158 | 0.12 |
| 61 | 6.51  | 1H-Imidazole-2-carboxaldehy de                                                                    | 802 | 96  | 0.12 |
| 62 | 52.86 | Furan, 2,2'-[1,2-ethanediylbis(oxy)]bi s[tetrahydro-5-(2-methoxy-4- methylphenyl)-5-methyl        | 768 | 470 | 0.11 |
| 63 | 50.92 | 1,2,3,4-Tetrahydro-1-methyl-7 -(4-nitrophenyl)oxazolo[2,3-f]p urine-2,4-dione                     | 710 | 327 | 0.11 |
| 64 | 47.07 | Pyridine, 1-acetyl-5-(3,4-dihydro-2H-py rrol-5-yl)-1,2,3,4-tetrahydro                             | 766 | 192 | 0.11 |
| 65 | 38.26 | Cyclopentadecanone, oxime                                                                         | 792 | 239 | 0.11 |
| 66 | 28.76 | 1H-1,2,3-Triazole-4-carboxald ehyde                                                               | 838 | 97  | 0.11 |

|    |       |                                          |     |     |      |
|----|-------|------------------------------------------|-----|-----|------|
| 67 | 17.31 | Silane, 2-butenyltrifluoro-              | 880 | 140 | 0.11 |
| 68 | 17.14 | Thiophen-2-methylamine, N-decyl-N-methyl | 865 | 267 | 0.11 |
| 69 | 21.06 | 3-Penten-1-yne, 3-methyl-                | 838 | 80  | 0.1  |
| 70 | 13.41 | Cyclohexene, 3-(2,2-dimethylpropoxy)-    | 781 | 168 | 0.1  |
| 71 | 12.93 | Ethyne, fluoro-                          | 978 | 44  | 0.1  |

**Supplementary Table S2:** GCMS analysis of Hydroalcoholic extract of *T. chebula* fruits collected from Kakching, Manipur.

|    | RT    | Compound                                                                        | RSI | MW  | Area % |
|----|-------|---------------------------------------------------------------------------------|-----|-----|--------|
| 1  | 20.29 | 1,2,3-Benzenetriol                                                              | 920 | 126 | 26.53  |
| 2  | 40.03 | 2-Cyclopenten-1-one, 2-hydroxy-3,4-dimethyl                                     | 877 | 126 | 12.79  |
| 3  | 16.23 | 5-Hydroxymethylfurfural                                                         | 891 | 126 | 11.26  |
| 4  | 15.55 | Catechol                                                                        | 925 | 110 | 6.85   |
| 5  | 9.22  | Phosphonic acid, (p-hydroxyphenyl)-                                             | 914 | 174 | 3.82   |
| 6  | 18.11 | 2,6-Difluorobenzoic acid, 4-nitrophenyl ester                                   | 865 | 279 | 3.05   |
| 7  | 27.51 | 1-Hexyl-2-nitrocyclohexane                                                      | 906 | 213 | 2.76   |
| 8  | 21.83 | Sucrose                                                                         | 820 | 342 | 2.27   |
| 9  | 22.51 | 1-Undecanol                                                                     | 922 | 172 | 1.88   |
| 10 | 13.80 | 4H-Pyran-4-one, 2,3-dihydro-3,5-dihydroxy-6- methyl                             | 856 | 144 | 1.68   |
| 11 | 5.25  | 3-Furaldehyde                                                                   | 947 | 96  | 1.59   |
| 12 | 10.20 | 2-Cyclohexen-1-one                                                              | 807 | 96  | 1.49   |
| 13 | 8.99  | Cyclobutaneethanol, á-methylene                                                 | 903 | 112 | 1.4    |
| 14 | 36.98 | Hexadecanamide                                                                  | 841 | 255 | 1.31   |
| 15 | 20.76 | sedanolide                                                                      | 887 | 194 | 1.14   |
| 16 | 10.85 | Benzeneacetaldehyde                                                             | 899 | 120 | 1.13   |
| 17 | 19.78 | Pentyl glycolate                                                                | 855 | 146 | 0.99   |
| 18 | 44.13 | 1-Methyl-4-isopropyl-cyclohexyl 2-hydroperfluorobutanoate                       | 917 | 334 | 0.85   |
| 19 | 44.76 | 9H-Xanthen-9-one, 1,3-dihydroxy-6-methoxy-8-methyl                              | 839 | 272 | 0.72   |
| 20 | 8.03  | Cyclopropene                                                                    | 899 | 40  | 0.67   |
| 21 | 12.08 | 2-Heptanone, 6-methyl-5-methylene                                               | 899 | 140 | 0.67   |
| 22 | 40.42 | Cyclooctanemethanol, à,à-dimethyl                                               | 836 | 170 | 0.61   |
| 23 | 20.11 | 1-Phenyl-1-decanol                                                              | 897 | 234 | 0.6    |
| 24 | 18.22 | (E)-4-Hydroxy-2-methyl-pent-2-enoic acid                                        | 880 | 130 | 0.52   |
| 25 | 9.63  | Carbamic acid, phenyl ester                                                     | 838 | 137 | 0.45   |
| 26 | 25.78 | Cyclohexane, 1,1'-[1,2-bis(1,1-dimethylethyl)-1,2-ethanediyl]bis-, (R*,R*)-(ñ)- | 769 | 306 | 0.44   |
| 27 | 21.20 | 3,6-methanonaphth[2,3-b]oxirene-2,7-dione, octahydro                            | 844 | 192 | 0.43   |

|    |       |                                                                   |     |     |      |
|----|-------|-------------------------------------------------------------------|-----|-----|------|
| 28 | 8.61  | 2-Furancarboxaldehyde, 5-methyl                                   | 831 | 110 | 0.42 |
| 29 | 9.46  | Phenol                                                            | 861 | 94  | 0.37 |
| 30 | 22.87 | Nitrous acid, ethyl ester                                         | 971 | 75  | 0.37 |
| 31 | 27.67 | 1-Hexadecanol                                                     | 861 | 242 | 0.36 |
| 32 | 7.58  | Proline, 2-methyl-5-oxo-, methyl ester                            | 964 | 157 | 0.34 |
| 33 | 12.66 | 1,3-Dioxolan-2-one, 4,5-bis(methylene)-                           | 869 | 112 | 0.34 |
| 34 | 19.92 | Propanoic acid, 3-chloro-, 4-formylphenyl ester                   | 831 | 212 | 0.34 |
| 35 | 26.95 | 2,4(1H,3H)-Quinolinedione, 3-benzoyl-3-(phenylmethyl)-            | 858 | 355 | 0.3  |
| 36 | 10.44 | 2,4-Azetidinedione, 3,3-diethyl-1-methyl                          | 837 | 155 | 0.29 |
| 37 | 21.06 | 2-Methyl-1,3-oxazole-4-carbo nitrile                              | 825 | 108 | 0.28 |
| 38 | 20.68 | 2,2-Diethyl-N-ethylpyrrolidine                                    | 839 | 155 | 0.27 |
| 39 | 5.51  | 2-Pentanone, 4-hydroxy-4-methyl                                   | 810 | 116 | 0.26 |
| 40 | 25.87 | 2-Methyl-1,3-oxathiolane-2-a cetic acid methyl ester              | 833 | 176 | 0.26 |
| 41 | 36.64 | 4,4-dimethyl-5-oxo-tetrahydro furan-3-carboxylic acid             | 841 | 158 | 0.26 |
| 42 | 13.57 | Methyl 2-[methoxy(methyl)amino]-2- methylpropanoate               | 844 |     | 0.24 |
| 43 | 6.40  | 1,3-Cyclopentadiene                                               | 861 | 66  | 0.23 |
| 44 | 9.58  | Carbamic acid, methyl-, phenyl ester                              | 855 | 151 | 0.23 |
| 45 | 21.48 | (9S,10R)-9,10-Epoxy-3Z,6Z-h eneicosadiene                         | 864 | 306 | 0.23 |
| 46 | 33.23 | Cyclooctanemethanol, à,à-dimethyl                                 | 851 | 170 | 0.23 |
| 47 | 10.72 | 2-Butyne                                                          | 925 | 54  | 0.22 |
| 48 | 22.26 | Disulfide, methyl (methylthio)phenylmethyl                        | 873 | 216 | 0.2  |
| 49 | 48.16 | 1,3,5-Trioxepane                                                  | 875 | 104 | 0.19 |
| 50 | 43.23 | 1,2,4-Benzenetricarboxylic acid, 1,2-dimethyl ester               | 800 | 238 | 0.19 |
| 51 | 17.51 | 4-Aminophenyl trifluoromethanesulfonate                           | 813 | 241 | 0.19 |
| 52 | 17.14 | 1,2-Benzenediol, 3-methoxy-                                       | 807 | 140 | 0.19 |
| 53 | 32.27 | 2,5-Cyclohexadien-1-one, 2,6-bis(1,1-dimethylethyl)-4-et hylidene | 846 | 232 | 0.18 |
| 54 | 56.59 | 11,12-Dihydroxyseychellane                                        | 797 | 238 | 0.17 |
| 55 | 43.29 | 2-Cyclohexen-1-one, 3-[2-(acetyloxy)butyl]-2,4,4-tr imethyl       | 846 | 252 | 0.17 |
| 56 | 6.53  | 4-Cyclopentene-1,3-dione                                          | 822 | 96  | 0.17 |
| 57 | 48.41 | 5-Bromo-thiophene-2-carboxa mide                                  | 742 | 205 | 0.16 |
| 58 | 13.41 | 1H-Tetrazol-5-amine                                               | 772 | 85  | 0.15 |
| 59 | 46.98 | 1H-Indene, 2,4,5,6,7,7a-hexahydro-7a-me thyl-3-(2-methylpropyl)-  | 809 | 192 | 0.14 |
| 60 | 33.93 | 2-Hexyl-1-octanol                                                 | 866 | 214 | 0.14 |
| 61 | 20.89 | 3-Hexen-1-yne                                                     | 842 | 80  | 0.14 |
| 62 | 38.26 | 2-Hexanone, 3-hydroxy-3,5-dimethyl                                | 775 | 144 | 0.13 |
| 63 | 5.84  | Ethyne, fluoro-                                                   | 961 | 44  | 0.13 |

|    |       |                                          |     |     |      |
|----|-------|------------------------------------------|-----|-----|------|
| 64 | 15.24 | 2-tert-Butyl-3,4,5,6-tetrahydro pyridine | 830 | 139 | 0.12 |
|----|-------|------------------------------------------|-----|-----|------|

**Supplementary Table S3:** GCMS analysis of Hydroalcoholic extract of *T. chebula* fruits collected from Sagolband, Manipur.

|    | RT    | Compound                                             | RSI | MW  | Area % |
|----|-------|------------------------------------------------------|-----|-----|--------|
| 1  | 20.30 | 1,2,3-Benzenetriol                                   | 921 | 126 | 40.41  |
| 2  | 40.04 | 2-Cyclopenten-1-one, 2-hydroxy-3,4-dimethyl          | 874 | 126 | 14.66  |
| 3  | 15.53 | Catechol                                             | 929 | 110 | 12.47  |
| 4  | 9.21  | Phosphonic acid, (p-hydroxyphenyl)-                  | 937 | 174 | 4.64   |
| 5  | 27.51 | 1-Hexyl-2-nitrocyclohexane                           | 908 | 213 | 2.11   |
| 6  | 22.50 | 1-Undecanol                                          | 927 | 172 | 1.74   |
| 7  | 36.98 | Hexadecanamide                                       | 860 | 255 | 1.56   |
| 8  | 25.73 | S-Methyl 2-methylpropanethioate                      | 852 | 118 | 1.26   |
| 9  | 10.18 | 2-Cyclohexen-1-one                                   | 838 | 96  | 1.22   |
| 10 | 16.31 | Diazene, 1-cyclopentyl-2-methoxy-, 1-oxide           | 818 | 144 | 0.94   |
| 11 | 18.11 | 2,4-Difluorobenzoic acid, 4-nitrophenyl ester        | 875 | 279 | 0.88   |
| 12 | 8.98  | 2-Butenal, 3-methyl-                                 | 892 | 84  | 0.85   |
| 13 | 13.81 | 4H-Pyran-4-one, 2,3-dihydro-3,5-dihydroxy-6- methyl  | 853 | 144 | 0.74   |
| 14 | 20.77 | Vanillin                                             | 812 | 152 | 0.74   |
| 15 | 7.08  | Ethanone, 1-(3-methyloxiranyl)-                      | 841 | 100 | 0.71   |
| 16 | 19.81 | Pentyl glycolate                                     | 902 | 146 | 0.70   |
| 17 | 9.56  | 1,2-Cyclohexanedione                                 | 833 | 112 | 0.69   |
| 18 | 16.25 | 4-Ethyl-2-hydroxycyclopent-2- en-1-one               | 819 | 126 | 0.58   |
| 19 | 5.27  | 3-Furaldehyde                                        | 930 | 96  | 0.50   |
| 20 | 40.43 | 9-Octadecenamide                                     | 852 | 281 | 0.49   |
| 21 | 22.95 | Nitrous acid, ethyl ester                            | 986 | 75  | 0.47   |
| 22 | 9.45  | Cyclopropylacetylene                                 | 883 | 66  | 0.44   |
| 23 | 44.76 | 1,1'-Diethyl-2,3,2',3'-tetrahydr o-2,2'-diperimidine | 877 | 394 | 0.43   |
| 24 | 8.60  | 2-Furancarboxaldehyde, 5-methyl                      | 879 | 110 | 0.40   |
| 25 | 10.85 | Cyclobutene, 2-propenylidene-                        | 892 | 92  | 0.38   |
| 26 | 21.48 | 4-Hydroxy-à-bromoethylpheno ne                       | 903 | 228 | 0.38   |
| 27 | 7.02  | Ethanone, 1-(3-methyloxiranyl)-                      | 848 | 100 | 0.37   |
| 28 | 36.64 | Oxacyclohexadecan-2-one, 16-methyl                   | 895 | 254 | 0.29   |
| 29 | 33.23 | 1,8-Nonanediol, 8-methyl-                            | 843 | 174 | 0.28   |
| 30 | 27.67 | Cetene                                               | 871 | 224 | 0.27   |
| 31 | 17.62 | 1,2,4,5-Tetrazine                                    | 888 | 82  | 0.25   |
| 32 | 21.07 | 1,2,3-Benzenetriol                                   | 856 | 126 | 0.24   |

|    |       |                                                                                   |     |     |      |
|----|-------|-----------------------------------------------------------------------------------|-----|-----|------|
| 33 | 12.66 | 1,3-Dioxolan-2-one, 4,5-bis(methylene)-                                           | 893 | 112 | 0.23 |
| 34 | 6.39  | 1,3-Cyclopentadiene                                                               | 887 | 66  | 0.20 |
| 35 | 43.10 | 2-(14-Carboxytetradecyl)-2-ethyl-4,4-dimethyl-1,3-oxazolidin e-N-oxyl             | 782 | 384 | 0.19 |
| 36 | 33.07 | Phthalic acid, butyl hept-4-yl ester                                              | 908 | 320 | 0.19 |
| 37 | 6.52  | 4-Cyclopentene-1,3-dione                                                          | 843 | 96  | 0.19 |
| 38 | 32.27 | Tetradecanoic acid, 10,13-dimethyl-, methyl ester                                 | 913 | 270 | 0.18 |
| 39 | 17.14 | 4-Heptanone, 1,1,1,7,7,7-hexafluoro                                               | 804 | 222 | 0.18 |
| 40 | 8.03  | 2,5-Furandione, 3-methyl-                                                         | 874 | 112 | 0.18 |
| 41 | 42.95 | 2-Propanone, hydrazone                                                            | 752 | 72  | 0.17 |
| 42 | 21.23 | Methylpyrazine-2-carboxylate                                                      | 796 | 138 | 0.17 |
| 43 | 40.69 | 4-Cycloocten-1-one, 8-butyl-, oxime, (Z,Z)-                                       | 902 | 195 | 0.16 |
| 44 | 10.47 | 2H-Pyran-2,6(3H)-dione                                                            | 811 | 112 | 0.16 |
| 45 | 7.53  | Pentanal, 2,2-dimethyl-                                                           | 799 | 114 | 0.16 |
| 46 | 45.36 | 1,1,1,3,5,5,7,7,7-Nonamethyl-3 - (trimethylsiloxy)tetrasiloxane                   | 773 | 384 | 0.15 |
| 47 | 39.95 | 5,10-Pentadecadienoic acid, (E,Z)-                                                | 910 | 238 | 0.15 |
| 48 | 12.97 | Butanoic acid, 4-hydroxy-2-methylene                                              | 822 | 116 | 0.15 |
| 49 | 36.06 | 1,1,1,3,5,5,7,7,7-Nonamethyl-3 - (trimethylsiloxy)tetrasiloxane                   | 843 | 384 | 0.14 |
| 50 | 22.27 | 9-Azabicyclo[3.3.1]non-2-ene-9-carboxylic acid, 6-(acetyloxy)-, ethyl ester, endo | 852 | 253 | 0.14 |
| 51 | 43.26 | Capsaicin, TMS derivative                                                         | 824 | 377 | 0.13 |
| 52 | 21.97 | 2-Ethoxyamphetamine                                                               | 882 | 179 | 0.13 |
| 53 | 11.52 | Ethanone, 1-(1H-pyrrol-2-yl)-                                                     | 787 | 109 | 0.13 |
| 54 | 24.57 | Ethyne, fluoro                                                                    | 955 | 44  | 0.12 |
| 55 | 10.72 | 2-Butyne                                                                          | 918 | 54  | 0.12 |
| 56 | 33.94 | 1-Octanol, 2-butyl-                                                               | 870 | 186 | 0.11 |
| 57 | 25.33 | 3-Methoxyformanilide                                                              | 934 | 151 | 0.11 |
| 58 | 51.55 | Nalbuphine, dimethyl deriv                                                        | 796 | 385 | 0.10 |
| 59 | 43.20 | 4-(4-Hydroxyphenyl)-4-methyl-2-pentanone, TMS derivative                          | 887 | 264 | 0.10 |

**Supplementary Table S4:** GCMS analysis of Hydroalcoholic extract of *T chebula* fruits collected from Yumnam Huidrom, Manipur.

|   | RT    | Compound name                              | RSI | Molecular weight | Area % |
|---|-------|--------------------------------------------|-----|------------------|--------|
| 1 | 20.34 | 1,2,3-Benzenetriol                         | 930 | 126              | 43.56  |
| 2 | 40.07 | 2-Hydroxy-3,5-dimethylcyclopent-2-en-1-one | 914 | 126              | 9.07   |
| 3 | 9.27  | Phenol                                     | 915 | 94               | 5.40   |

|    |       |                                                                                            |     |     |      |
|----|-------|--------------------------------------------------------------------------------------------|-----|-----|------|
| 4  | 16.32 | 5-Hydroxymethylfurfural                                                                    | 888 | 126 | 4.03 |
| 5  | 10.26 | 2,3,4,5-Tetrahydropyridazine                                                               | 868 | 84  | 1.65 |
| 6  | 15.62 | 1,2-Benzenediol, mono(methylcarbamate)                                                     | 905 | 167 | 1.57 |
| 7  | 10.89 | Benzeneacetaldehyde                                                                        | 890 | 120 | 1.56 |
| 8  | 8.07  | 2,5-Furandione, 3-methyl-                                                                  | 869 | 112 | 1.18 |
| 9  | 25.83 | 2,6,10,14-Tetramethylpentadecan-6-ol                                                       | 848 | 284 | 1.06 |
| 10 | 37.02 | 3-Ethyl-2-methyl-2-heptanol                                                                | 849 | 158 | 0.99 |
| 11 | 9.06  | Cyclobutaneethanol, $\alpha$ -methylene                                                    | 880 | 112 | 0.93 |
| 12 | 15.75 | 1,2-Benzenediol, mono(methylcarbamate)                                                     | 879 | 167 | 0.91 |
| 13 | 5.33  | 3-Furaldehyde                                                                              | 896 | 96  | 0.89 |
| 14 | 17.17 | Furan, 2-(1,2-diethoxyethyl)-                                                              | 879 | 184 | 0.77 |
| 15 | 22.64 | 1,2-Dicarboxy-3-(4-chlorophenyl)-2,3(1H)-dihydropyrido(1,2-a)benzimidazole                 | 887 | 370 | 0.73 |
| 16 | 22.94 | 3,4,5-Trimethoxy- $\alpha$ -methyl- $\alpha$ -nitrostyrene                                 | 727 | 253 | 0.71 |
| 17 | 24.09 | 2-Butenedioic acid, dibutyl ester                                                          | 873 | 228 | 0.70 |
| 18 | 12.70 | Hex-4-en-3-one                                                                             | 822 | 96  | 0.68 |
| 19 | 10.77 | 1-Methylcyclopropene                                                                       | 866 | 54  | 0.64 |
| 20 | 21.52 | 4-Hydroxy- $\alpha$ -bromoethylphenone                                                     | 898 | 228 | 0.64 |
| 21 | 25.71 | 1H-1,3-Diazepine, 4,5,6,7-tetrahydro-2-methyl                                              | 843 | 112 | 0.64 |
| 22 | 32.31 | 2,5-Cyclohexadien-1-one, 2,6-bis(1,1-dimethylethyl)-4-ethylidene                           | 882 | 232 | 0.64 |
| 23 | 20.81 | 3-Methoxy-4-hydroxy mandelonitrile                                                         | 820 | 179 | 0.63 |
| 24 | 9.48  | 2,2,4-Trimethyl-3-pentanone                                                                | 845 | 128 | 0.59 |
| 25 | 53.99 | Glycinamide, N(2)-methyl-                                                                  | 711 | 88  | 0.59 |
| 26 | 22.01 | 1-Phenanthrenecarboxylic acid                                                              | 668 | 346 | 0.54 |
| 27 | 23.55 | 6-Fluoro-2-trifluoromethylbenzoic acid, 2-formyl-4,6-dichlorophenyl ester                  | 893 | 380 | 0.51 |
| 28 | 57.92 | (7E)-2-Amino-4-hydroxy-7-[2-(4-methoxyphenyl)-2-oxoethylidene]-7,8-dihydro-6(5H)-pteridine | 688 | 327 | 0.50 |
| 29 | 17.35 | Ritalinic acid                                                                             | 676 | 219 | 0.47 |
| 30 | 43.34 | Formamide, N,N-dimethyl-                                                                   | 828 | 73  | 0.47 |
| 31 | 36.69 | Phosphonofluoridothioic hydrazide, P,2,2-trimethyl                                         | 789 | 156 | 0.45 |
| 32 | 9.68  | 2-Ethyl-5-propylcyclopentanone                                                             | 819 | 154 | 0.44 |
| 33 | 25.05 | 5,6,8,4'-Tetrahydroxy-7,3'-dimethoxyflavone                                                | 778 | 346 | 0.42 |
| 34 | 54.87 | Thieno[2,3-b]pyridine, 5-ethyl-3-nitro                                                     | 817 | 208 | 0.39 |
| 35 | 12.16 | 4-Methyl-2,4-bis(p-hydroxyphenyl)pent-1-ene, 2TMS derivative                               | 710 | 412 | 0.37 |
| 36 | 44.83 | Ferrocenecarboxylic acid, 1',2-dimethyl-,                                                  | 790 | 272 | 0.37 |

|    |       |                                                                                    |     |     |      |
|----|-------|------------------------------------------------------------------------------------|-----|-----|------|
|    |       | methyl ester                                                                       |     |     |      |
| 37 | 48.69 | 16-Azatricyclo[9.2.2.1(4,8)]he xadeca-4,6,8(16),11,13,14-hex aene, 16-oxide        | 823 | 225 | 0.37 |
| 38 | 8.68  | 2-Furancarboxaldehyde, 5-methyl                                                    | 873 | 110 | 0.36 |
| 39 | 36.19 | 9 1-(2-(3-Cyclohexenyl)ethyl)sila trane                                            | 925 | 283 | 0.36 |
| 40 | 50.92 | 4-(Trimethylsilyl)pyrazole, 2TMS derivative                                        | 724 | 212 | 0.36 |
| 41 | 44.28 | 2,2-Diphenyl-6-methyl-1,3-di oxa-6-aza-2-silacyclooctane                           | 739 | 299 | 0.35 |
| 42 | 45.62 | 4-Methyl-2H-pyran                                                                  | 751 | 96  | 0.35 |
| 43 | 62.10 | Urea, propyl-                                                                      | 802 | 102 | 0.35 |
| 44 | 24.59 | Propanamide, N-(aminocarbonyl)-                                                    | 837 | 116 | 0.34 |
| 45 | 52.34 | Benzene, 5-(2-isothiocyanatoethyl)-1,2, 3-trimethoxy                               | 716 | 253 | 0.34 |
| 46 | 52.07 | 4-(4-Hydroxyphenyl)-4-methy l-2-pentanone, TMS derivative                          | 879 | 264 | 0.33 |
| 47 | 59.64 | 1,2,3-Triphenyl-3-isopropyl-c yclopropene                                          | 789 | 310 | 0.33 |
| 48 | 43.23 | 2-Butanol, 3-methyl-4-(trimethylstannyl)-                                          | 796 | 252 | 0.32 |
| 49 | 48.21 | Ethyl 2-methyl-1,3-benzodioxole-2-e thanoate                                       | 777 | 222 | 0.32 |
| 50 | 50.12 | Phenanthrene, 4-methoxy-                                                           | 800 | 208 | 0.32 |
| 51 | 50.42 | 1,2,3,4-Tetrahydro-1-methyl-7 -(4-nitrophenyl)oxazolo[2,3-f]p urine-2,4-dione      | 772 | 327 | 0.32 |
| 52 | 21.10 | 3-Hexen-1-yne                                                                      | 860 | 80  | 0.31 |
| 53 | 44.45 | Thieno[2,3-b]pyridine, 5-ethyl-3-nitro                                             | 738 | 208 | 0.31 |
| 54 | 48.92 | 2,3,4,5-Tetrahydro-7,8-(methy lenedioxy)-N-(diethylphospho ryl)-3-benzazepin-1-one | 813 | 341 | 0.30 |
| 55 | 56.15 | Pyrido[3,2-d]pyrimidin-4-ol                                                        | 770 | 147 | 0.30 |
| 56 | 20.05 | 1-Phenanthrenecarboxylic acid,                                                     | 809 | 346 | 0.29 |
| 57 | 47.66 | 2,2-Dimethyl-7-methoxy-chrom anone                                                 | 809 | 206 | 0.29 |
| 58 | 43.29 | 1-Methyl-1,2,2-tri(pentafluoro benzoyl)-hydrazine                                  | 788 | 628 | 0.28 |
| 59 | 52.50 | 3(2H)-Benzofuranone, 6-methoxy-2-[(3-methoxyphe nyl)methylene]-, (E)-              | 775 | 282 | 0.28 |
| 60 | 25.92 | 1-Phenanthrenecarboxylic acid,                                                     | 788 | 346 | 0.27 |
| 61 | 43.45 | Thiophen-2-methylamine, N-(2-fluorophenyl)-                                        | 732 | 207 | 0.27 |
| 62 | 60.56 | Bismuthine, triethyl                                                               | 722 | 296 | 0.27 |
| 63 | 52.90 | 1,3-Dioxolo[4,5-c]acridin-6(11 H)-one, 5-ethoxy-4-methoxy-11-methy l               | 781 | 327 | 0.26 |



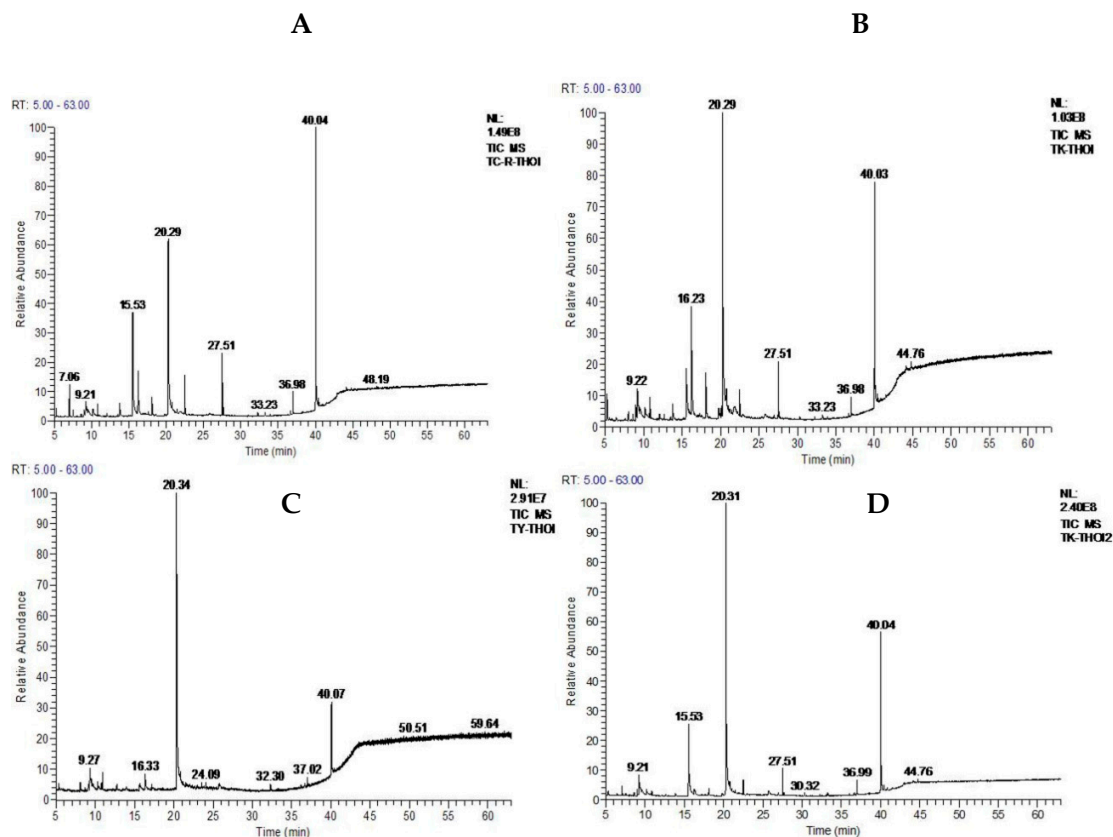

**Supplementary Figure S1:** GCMS profile of hydroalcoholic extract of *T. chebula* fruits collected from four (4) different locations of Manipur. (A) Hydroalcoholic extract of *T. chebula* collected from Chandel, Manipur. (B) Hydroalcoholic extract of *T. chebula* collected from Kakching, Manipur. (C) Hydroalcoholic extract of *T. chebula* collected from Yumnam Huidrom, Manipur (D) Hydroalcoholic extract of *T. chebula* collected from, Manipur.

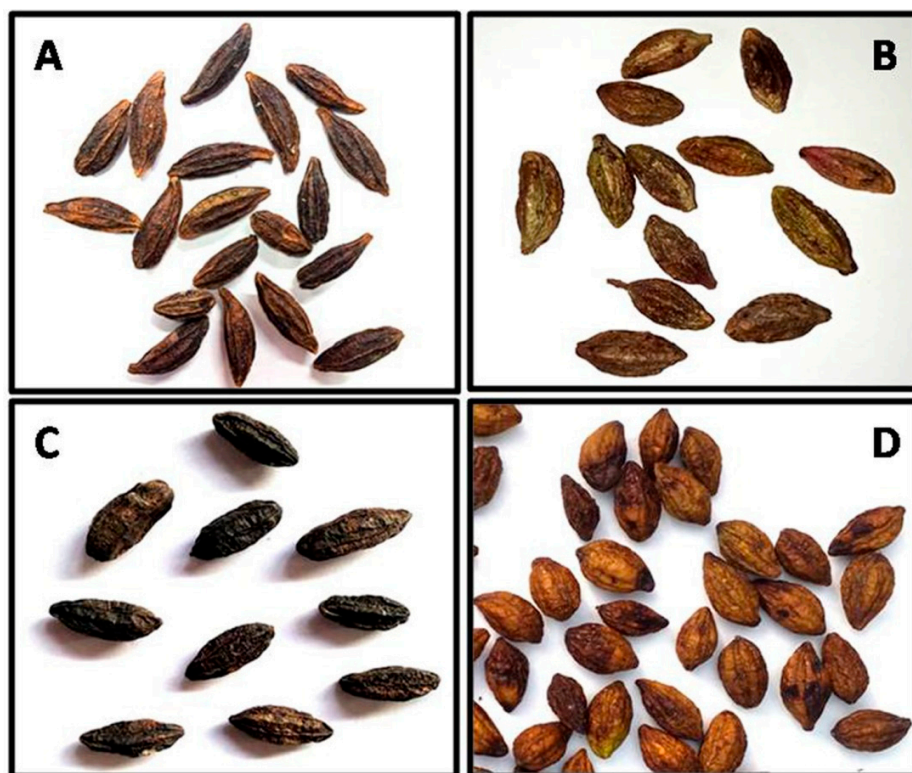

**Supplementary Figure S2:** Fruits of *T. chebula* collected from Chandel, Manipur (TCH); (B) Kakching, Manipur (TKH); (C) Sagolband, Imphal East, Manipur (TSH) and Yumnam Huidrom, Manipur (TYH).

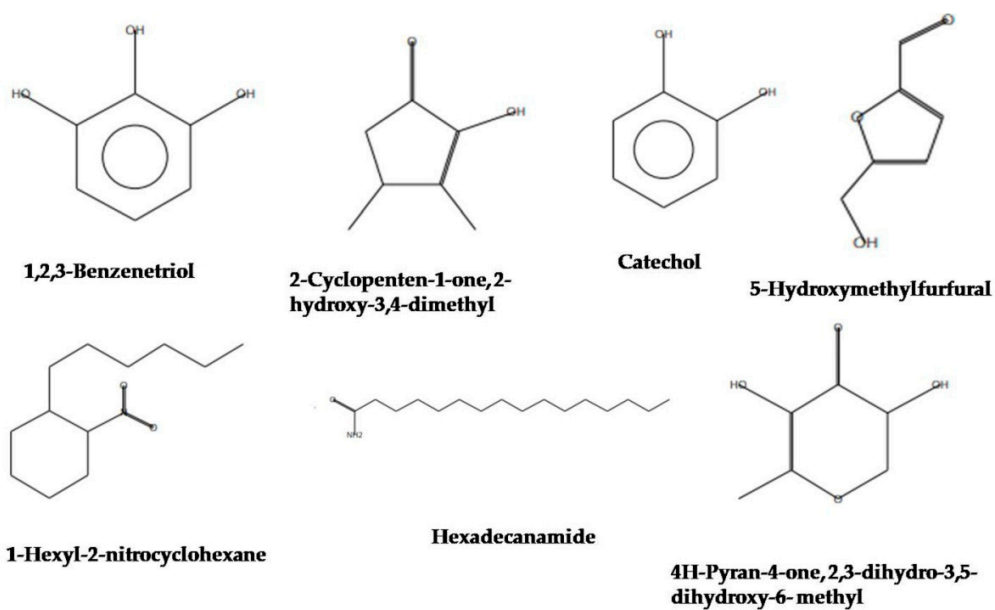

**Supplementary Figure S3:** Structural representation of the major compounds detected in GC-MS results of the *T. chebula* fruit extracts
